## **Classification and Treatment of Tibial Tubercle Fractures in Adults**

Xiang Yao<sup>1</sup>, Hongyuan Liu<sup>1,2</sup>, Minjie Hu<sup>1</sup>, Chong Wang<sup>1,2</sup>, Han Miao<sup>1,2</sup> and Jilei Tang<sup>3</sup>

Xiang Yao, Hongyuan Liu and Minjie Hu contributed equally to this work.

<sup>1</sup> Department of Orthopaedics, The Affiliated People's Hospital of Jiangsu University, Zhenjiang, Jiangsu 212001, China

<sup>2</sup> Jiangsu University, Zhenjiang, Jiangsu 212000, China

<sup>3</sup> Department of Orthopaedics, Qidong Hospital of Traditional Chinese Medicine, Nantong, Jiangsu 226200, China

The authors have withdrawn their manuscript owing to 1. The paper needs structural changes. 2. Some of the data were found to have errors that need to be corrected after the previous submission. Therefore, the authors do not wish this work to be cited as reference for the project. If you have any questions, please contact the corresponding author.
